# Supplementary material for: Use of Dipeptidyl Peptidase-4 Inhibitors and the Reporting of Infections: A Disproportionality Analysis in the World Health Organization VigiBase
Source: Oxford University Press journal article supplement (doi:10.2337/dc10-1771), 2011-01-20
Supplement: dc101771supplementarydata.pdf [file dc101771supplementarydata.pdf]

SUPPLEMENTARY DATA

**Supplementary Table 1. Infections for DPP-4 inhibitors (reported as lower level MedDRA term)**

|                                           | Number of MedDRA terms of infection (n=242) |
|-------------------------------------------|---------------------------------------------|
| <b>Upper respiratory tract infections</b> | <b>171 (70.7%)</b>                          |
| Upper respiratory tract infection         | 90 (37.2%)                                  |
| Nasopharyngitis                           | 37 (15.3%)                                  |
| Sinusitis                                 | 18 (7.4%)                                   |
| Rhinitis                                  | 9 (3.7%)                                    |
| Pharyngitis                               | 8 (3.3%)                                    |
| Laryngitis                                | 4 (1.7%)                                    |
| Acute tracheobronchitis                   | 2 (0.8%)                                    |
| Influenza                                 | 2 (0.8%)                                    |
| Tracheitis                                | 1 (0.4%)                                    |
| <b>Lower respiratory tract infections</b> | <b>20 (8.3%)</b>                            |
| Pneumonia                                 | 12 (5.0%)                                   |
| Bronchitis                                | 7 (2.9%)                                    |
| Lower respiratory tract infection         | 1 (0.4%)                                    |
| <b>Urinary tract infections</b>           | <b>7 (2.9%)</b>                             |
| Urinary tract infection                   | 11 (4.5%)                                   |
| Cystitis                                  | 1 (0.4%)                                    |
| Pyelonephritis                            | 1 (0.4%)                                    |
| <b>Other infections</b>                   | <b>51 (21.1%)</b>                           |
| Respiratory tract infection NOS           | 9 (3.7%)                                    |
| Sepsis                                    | 4 (1.7%)                                    |
| Infection NOS                             | 4 (1.7%)                                    |
| Fungal infection                          | 3 (1.2%)                                    |
| Candidiasis                               | 2 (0.8%)                                    |
| Other infections*                         | 28 (11.6%)                                  |

\* All reported only once
